# Supplementary material for: Cardiovascular disease, associated risk factors, and risk of dementia: An umbrella review of meta-analyses
Source: PubMed Central journal article supplement (PMC10910908; doi:10.3389/fepid.2023.1095236), 2023-02-09
Supplement: Datasheet1.pdf [file Datasheet1.pdf]

## *Supplementary Material*

### **Supplementary Table 1.** Search strategy for each database searched

Database(s): **Ovid MEDLINE(R) ALL** 1946 to October 06, 2021

Search Strategy:

| # | Searches                                                                                                                                                                                                                                                                                                                                                                                             | Results |
|---|------------------------------------------------------------------------------------------------------------------------------------------------------------------------------------------------------------------------------------------------------------------------------------------------------------------------------------------------------------------------------------------------------|---------|
| 1 | exp Dementia/                                                                                                                                                                                                                                                                                                                                                                                        | 180977  |
| 2 | (dement* or Alzhem*).mp. [mp=title, abstract, original title, name of substance word, subject heading word, floating sub-heading word, keyword heading word, organism supplementary concept word, protocol supplementary concept word, rare disease supplementary concept word, unique identifier, synonyms]                                                                                         | 266433  |
| 3 | 1 or 2                                                                                                                                                                                                                                                                                                                                                                                               | 284820  |
| 4 | exp Heart Failure/                                                                                                                                                                                                                                                                                                                                                                                   | 131469  |
| 5 | ((myocard* or cardia* or heart or ventric*) adj (failure or decompensation or insufficien* or dysfunction*)).mp. [mp=title, abstract, original title, name of substance word, subject heading word, floating sub-heading word, keyword heading word, organism supplementary concept word, protocol supplementary concept word, rare disease supplementary concept word, unique identifier, synonyms] | 280846  |
| 6 | cardiomyopath*.mp. [mp=title, abstract, original title, name of substance word, subject heading word, floating sub-heading word, keyword heading word, organism supplementary concept word, protocol supplementary concept word, rare disease supplementary concept word, unique identifier, synonyms]                                                                                               | 105086  |
| 7 | 4 or 5 or 6                                                                                                                                                                                                                                                                                                                                                                                          | 351903  |
| 8 | exp Hypertension/                                                                                                                                                                                                                                                                                                                                                                                    | 299274  |

## Supplementary Material

|    |                                                                                                                                                                                                                                                                                                                                                                                                                                                                                |         |
|----|--------------------------------------------------------------------------------------------------------------------------------------------------------------------------------------------------------------------------------------------------------------------------------------------------------------------------------------------------------------------------------------------------------------------------------------------------------------------------------|---------|
| 9  | (hypertens* or "blood pressure").mp. [mp=title, abstract, original title, name of substance word, subject heading word, floating sub-heading word, keyword heading word, organism supplementary concept word, protocol supplementary concept word, rare disease supplementary concept word, unique identifier, synonyms]                                                                                                                                                       | 837454  |
| 10 | exp Blood Pressure Monitoring, Ambulatory/                                                                                                                                                                                                                                                                                                                                                                                                                                     | 10660   |
| 11 | ("24-hour blood pressure monitoring" or "home blood pressure monitoring").mp. [mp=title, abstract, original title, name of substance word, subject heading word, floating sub-heading word, keyword heading word, organism supplementary concept word, protocol supplementary concept word, rare disease supplementary concept word, unique identifier, synonyms]                                                                                                              | 874     |
| 12 | 8 or 9 or 10 or 11                                                                                                                                                                                                                                                                                                                                                                                                                                                             | 837478  |
| 13 | ("atrial fibrillation" or "atrial flutter" or AFIB or arrhythmi* or AF).mp. [mp=title, abstract, original title, name of substance word, subject heading word, floating sub-heading word, keyword heading word, organism supplementary concept word, protocol supplementary concept word, rare disease supplementary concept word, unique identifier, synonyms]                                                                                                                | 251951  |
| 14 | exp Arrhythmias, Cardiac/                                                                                                                                                                                                                                                                                                                                                                                                                                                      | 221098  |
| 15 | 13 or 14                                                                                                                                                                                                                                                                                                                                                                                                                                                                       | 324698  |
| 16 | exp Vascular Stiffness/                                                                                                                                                                                                                                                                                                                                                                                                                                                        | 7068    |
| 17 | ("arterial stiffness" or "pulse pressure" or "wave reflections" or "augmentation index" or "pulse wave velocity" or "aortic stiffness" or "central pressure" or "arterial compliance").mp. [mp=title, abstract, original title, name of substance word, subject heading word, floating sub-heading word, keyword heading word, organism supplementary concept word, protocol supplementary concept word, rare disease supplementary concept word, unique identifier, synonyms] | 25082   |
| 18 | 16 or 17                                                                                                                                                                                                                                                                                                                                                                                                                                                                       | 26141   |
| 19 | exp Myocardial Ischemia/                                                                                                                                                                                                                                                                                                                                                                                                                                                       | 447384  |
| 20 | ((isch?emic or coronary) and (heart or arter* or disease or syndrome)) or myocard* or angina).mp. [mp=title, abstract, original title, name of substance word, subject heading word, floating sub-heading word, keyword heading word, organism supplementary concept word, protocol supplementary concept word, rare disease supplementary concept word, unique identifier, synonyms]                                                                                          | 1010859 |

|    |                                                                                                                                                                                                                                                                                                                                                                                  |         |
|----|----------------------------------------------------------------------------------------------------------------------------------------------------------------------------------------------------------------------------------------------------------------------------------------------------------------------------------------------------------------------------------|---------|
| 21 | 19 or 20                                                                                                                                                                                                                                                                                                                                                                         | 1018728 |
| 22 | exp Hyperlipidemias/                                                                                                                                                                                                                                                                                                                                                             | 68030   |
| 23 | (hyperlipid?emia or dyslipid?emia or hypercholesterol?emia or cholesterol or HDL or LDL).mp. [mp=title, abstract, original title, name of substance word, subject heading word, floating sub-heading word, keyword heading word, organism supplementary concept word, protocol supplementary concept word, rare disease supplementary concept word, unique identifier, synonyms] | 396380  |
| 24 | 22 or 23                                                                                                                                                                                                                                                                                                                                                                         | 409682  |
| 25 | 7 or 12 or 15 or 18 or 21 or 24                                                                                                                                                                                                                                                                                                                                                  | 2368185 |
| 26 | (systematic review or meta-analysis).pt.                                                                                                                                                                                                                                                                                                                                         | 240852  |
| 27 | meta-analysis/ or systematic review/ or systematic reviews as topic/ or meta-analysis as topic/ or "meta analysis (topic)"/ or "systematic review (topic)"/ or exp technology assessment, biomedical/ or network meta-analysis/                                                                                                                                                  | 274471  |
| 28 | ((systematic* adj3 (review* or overview*)) or (methodologic* adj3 (review* or overview*))).ti,ab,kf,kw.                                                                                                                                                                                                                                                                          | 242670  |
| 29 | ((quantitative adj3 (review* or overview* or synthes*)) or (research adj3 (integrati* or overview*))).ti,ab,kf,kw.                                                                                                                                                                                                                                                               | 12798   |
| 30 | ((integrative adj3 (review* or overview*)) or (collaborative adj3 (review* or overview*)) or (pool* adj3 analy*)).ti,ab,kf,kw.                                                                                                                                                                                                                                                   | 31976   |
| 31 | (data synthes* or data extraction* or data abstraction*).ti,ab,kf,kw.                                                                                                                                                                                                                                                                                                            | 32342   |
| 32 | (handsearch* or hand search*).ti,ab,kf,kw.                                                                                                                                                                                                                                                                                                                                       | 10073   |
| 33 | (mantel haenszel or peto or der simonian or dersimonian or fixed effect* or latin square*).ti,ab,kf,kw.                                                                                                                                                                                                                                                                          | 30148   |
| 34 | (met analy* or metanaly* or technology assessment* or HTA or HTAs or technology overview* or technology appraisal*).ti,ab,kf,kw.                                                                                                                                                                                                                                                 | 10518   |
| 35 | (meta regression* or metaregression*).ti,ab,kf,kw.                                                                                                                                                                                                                                                                                                                               | 11256   |
| 36 | (meta-analy* or metaanaly* or systematic review* or biomedical technology assessment* or bio-medical technology assessment*).mp,hw.                                                                                                                                                                                                                                              | 372788  |
| 37 | (medline or cochrane or pubmed or medlars or embase or cinahl).ti,ab,hw.                                                                                                                                                                                                                                                                                                         | 269834  |

|    |                                                                                                 |        |
|----|-------------------------------------------------------------------------------------------------|--------|
| 38 | (cochrane or (health adj2 technology assessment) or evidence report).jw.                        | 20393  |
| 39 | (comparative adj3 (efficacy or effectiveness)).ti,ab,kf,kw.                                     | 15194  |
| 40 | (outcomes research or relative effectiveness).ti,ab,kf,kw.                                      | 10231  |
| 41 | ((indirect or indirect treatment or mixed-treatment or bayesian) adj3 comparison*).ti,ab,kf,kw. | 3725   |
| 42 | (meta-analysis or systematic review).mp.                                                        | 348274 |
| 43 | (multi* adj3 treatment adj3 comparison*).ti,ab,kf,kw.                                           | 263    |
| 44 | (mixed adj3 treatment adj3 (meta-analy* or metaanaly*)).ti,ab,kf,kw.                            | 174    |
| 45 | umbrella review*.ti,ab,kf,kw.                                                                   | 747    |
| 46 | (multi* adj2 paramet* adj2 evidence adj2 synthesis).ti,ab,kf,kw.                                | 13     |
| 47 | (multiparamet* adj2 evidence adj2 synthesis).ti,ab,kf,kw.                                       | 17     |
| 48 | (multi-paramet* adj2 evidence adj2 synthesis).ti,ab,kf,kw.                                      | 11     |
| 49 | or/26-48                                                                                        | 557344 |
| 50 | 3 and 25 and 49                                                                                 | 850    |

Database(s): **Embase** 1974 to 2021 Week 39

Search Strategy:

| # | Searches                                                                                                                                                                                                                      | Results |
|---|-------------------------------------------------------------------------------------------------------------------------------------------------------------------------------------------------------------------------------|---------|
| 1 | exp dementia/                                                                                                                                                                                                                 | 388698  |
| 2 | (dement* or Alzheim*).mp. [mp=title, abstract, heading word, drug trade name, original title, device manufacturer, drug manufacturer, device trade name, keyword heading word, floating subheading word, candidate term word] | 400611  |
| 3 | 1 or 2                                                                                                                                                                                                                        | 457053  |
| 4 | exp heart failure/                                                                                                                                                                                                            | 548773  |

|    |                                                                                                                                                                                                                                                                                                                                                                                                |         |
|----|------------------------------------------------------------------------------------------------------------------------------------------------------------------------------------------------------------------------------------------------------------------------------------------------------------------------------------------------------------------------------------------------|---------|
| 5  | ((myocard* or cardia* or heart or ventric*) adj (failure or decompensation or insufficien* or dysfunction*)).mp. [mp=title, abstract, heading word, drug trade name, original title, device manufacturer, drug manufacturer, device trade name, keyword heading word, floating subheading word, candidate term word]                                                                           | 493780  |
| 6  | cardiomyopath*.mp. [mp=title, abstract, heading word, drug trade name, original title, device manufacturer, drug manufacturer, device trade name, keyword heading word, floating subheading word, candidate term word]                                                                                                                                                                         | 169787  |
| 7  | 4 or 5 or 6                                                                                                                                                                                                                                                                                                                                                                                    | 726385  |
| 8  | exp hypertension/                                                                                                                                                                                                                                                                                                                                                                              | 791905  |
| 9  | (hypertens* or "blood pressure").mp.                                                                                                                                                                                                                                                                                                                                                           | 1369928 |
| 10 | exp blood pressure monitoring/                                                                                                                                                                                                                                                                                                                                                                 | 51951   |
| 11 | ("24-hour blood pressure monitoring" or "home blood pressure monitoring").mp. [mp=title, abstract, heading word, drug trade name, original title, device manufacturer, drug manufacturer, device trade name, keyword heading word, floating subheading word, candidate term word]                                                                                                              | 1545    |
| 12 | 8 or 9 or 10 or 11                                                                                                                                                                                                                                                                                                                                                                             | 1424777 |
| 13 | ("atrial fibrillation" or "atrial flutter" or AFIB or arrhythmi* or AF).mp. [mp=title, abstract, heading word, drug trade name, original title, device manufacturer, drug manufacturer, device trade name, keyword heading word, floating subheading word, candidate term word]                                                                                                                | 393024  |
| 14 | exp atrial fibrillation/ or exp heart atrium arrhythmia/ or exp heart fibrillation/                                                                                                                                                                                                                                                                                                            | 186949  |
| 15 | 13 or 14                                                                                                                                                                                                                                                                                                                                                                                       | 443093  |
| 16 | exp arterial stiffness/                                                                                                                                                                                                                                                                                                                                                                        | 24207   |
| 17 | ("arterial stiffness" or "pulse pressure" or "wave reflections" or "augmentation index" or "pulse wave velocity" or "aortic stiffness" or "central pressure" or "arterial compliance").mp. [mp=title, abstract, heading word, drug trade name, original title, device manufacturer, drug manufacturer, device trade name, keyword heading word, floating subheading word, candidate term word] | 51574   |
| 18 | 16 or 17                                                                                                                                                                                                                                                                                                                                                                                       | 51574   |

|    |                                                                                                                                                                                                                                                                                                       |         |
|----|-------------------------------------------------------------------------------------------------------------------------------------------------------------------------------------------------------------------------------------------------------------------------------------------------------|---------|
| 19 | exp ischemic heart disease/                                                                                                                                                                                                                                                                           | 703720  |
| 20 | ((isch?emic or coronary) and (heart or arter* or disease or syndrome)) or myocard* or angina).mp. [mp=title, abstract, heading word, drug trade name, original title, device manufacturer, drug manufacturer, device trade name, keyword heading word, floating subheading word, candidate term word] | 1350769 |
| 21 | 19 or 20                                                                                                                                                                                                                                                                                              | 1424726 |
| 22 | exp hyperlipidemia/                                                                                                                                                                                                                                                                                   | 167922  |
| 23 | (hyperlipid?emia or dyslipid?emia or hypercholesterol?emia or cholesterol or HDL or LDL).mp. [mp=title, abstract, heading word, drug trade name, original title, device manufacturer, drug manufacturer, device trade name, keyword heading word, floating subheading word, candidate term word]      | 644592  |
| 24 | 22 or 23                                                                                                                                                                                                                                                                                              | 655347  |
| 25 | 7 or 12 or 15 or 18 or 21 or 24                                                                                                                                                                                                                                                                       | 3466543 |
| 26 | "systematic review".mp. or meta analysis.pt. [mp=title, abstract, heading word, drug trade name, original title, device manufacturer, drug manufacturer, device trade name, keyword heading word, floating subheading word, candidate term word]                                                      | 398491  |
| 27 | meta-analysis/ or systematic review/ or systematic reviews as topic/ or meta-analysis as topic/ or "meta analysis (topic)"/ or "systematic review (topic)"/ or exp technology assessment, biomedical/ or network meta-analysis/                                                                       | 489189  |
| 28 | ((systematic* adj3 (review* or overview*)) or (methodologic* adj3 (review* or overview*))).ti,ab,kf,kw.                                                                                                                                                                                               | 299531  |
| 29 | ((quantitative adj3 (review* or overview* or synthes*)) or (research adj3 (integrati* or overview*))).ti,ab,kf,kw.                                                                                                                                                                                    | 15089   |
| 30 | ((integrative adj3 (review* or overview*)) or (collaborative adj3 (review* or overview*)) or (pool* adj3 analy*)).ti,ab,kf,kw.                                                                                                                                                                        | 45306   |
| 31 | (data synthes* or data extraction* or data abstraction*).ti,ab,kf,kw.                                                                                                                                                                                                                                 | 39746   |
| 32 | (handsearch* or hand search*).ti,ab,kf,kw.                                                                                                                                                                                                                                                            | 12266   |
| 33 | (mantel haenszel or peto or der simonian or dersimonian or fixed effect* or latin square*).ti,ab,kf,kw.                                                                                                                                                                                               | 39904   |

|    |                                                                                                                                     |        |
|----|-------------------------------------------------------------------------------------------------------------------------------------|--------|
| 34 | (met analy* or metanaly* or technology assessment* or HTA or HTAs or technology overview* or technology appraisal*).ti,ab,kf,kw.    | 17057  |
| 35 | (meta regression* or metaregression*).ti,ab,kf,kw.                                                                                  | 13916  |
| 36 | (meta-analy* or metaanaly* or systematic review* or biomedical technology assessment* or bio-medical technology assessment*).mp,hw. | 587078 |
| 37 | (medline or cochrane or pubmed or medlars or embase or cinahl).ti,ab,hw.                                                            | 353233 |
| 38 | (cochrane or (health adj2 technology assessment) or evidence report).jw.                                                            | 28625  |
| 39 | (comparative adj3 (efficacy or effectiveness)).ti,ab,kf,kw.                                                                         | 22179  |
| 40 | (outcomes research or relative effectiveness).ti,ab,kf,kw.                                                                          | 14691  |
| 41 | ((indirect or indirect treatment or mixed-treatment or bayesian) adj3 comparison*).ti,ab,kf,kw.                                     | 6396   |
| 42 | (meta-analysis or systematic review).mp.                                                                                            | 552309 |
| 43 | (multi* adj3 treatment adj3 comparison*).ti,ab,kf,kw.                                                                               | 380    |
| 44 | (mixed adj3 treatment adj3 (meta-analy* or metaanaly*)).ti,ab,kf,kw.                                                                | 252    |
| 45 | umbrella review*.ti,ab,kf,kw.                                                                                                       | 783    |
| 46 | (multi* adj2 paramet* adj2 evidence adj2 synthesis).ti,ab,kf,kw.                                                                    | 25     |
| 47 | (multiparamet* adj2 evidence adj2 synthesis).ti,ab,kf,kw.                                                                           | 18     |
| 48 | (multi-paramet* adj2 evidence adj2 synthesis).ti,ab,kf,kw.                                                                          | 20     |
| 49 | or/26-48                                                                                                                            | 806629 |
| 50 | 3 and 25 and 49                                                                                                                     | 2622   |

## APA PsycInfo 1806 to September Week 4 2021

| #  | Searches                                                                                                                                                                                                                     | Results |
|----|------------------------------------------------------------------------------------------------------------------------------------------------------------------------------------------------------------------------------|---------|
| 1  | exp Dementia/                                                                                                                                                                                                                | 82794   |
| 2  | (dement* or Alzheim*).mp. [mp=title, abstract, heading word, table of contents, key concepts, original title, tests & measures, mesh]                                                                                        | 116403  |
| 3  | 1 or 2                                                                                                                                                                                                                       | 116936  |
| 4  | ((myocard* or cardia* or heart or ventric*) adj (failure or decompensation or insufficien* or dysfunction*)).mp. [mp=title, abstract, heading word, table of contents, key concepts, original title, tests & measures, mesh] | 4653    |
| 5  | cardiomyopath*.mp. [mp=title, abstract, heading word, table of contents, key concepts, original title, tests & measures, mesh]                                                                                               | 978     |
| 6  | 4 or 5                                                                                                                                                                                                                       | 5367    |
| 7  | exp Hypertension/                                                                                                                                                                                                            | 7693    |
| 8  | (hypertens* or "blood pressure").mp. [mp=title, abstract, heading word, table of contents, key concepts, original title, tests & measures, mesh]                                                                             | 39062   |
| 9  | ("24-hour blood pressure monitoring" or "home blood pressure monitoring").mp. [mp=title, abstract, heading word, table of contents, key concepts, original title, tests & measures, mesh]                                    | 26      |
| 10 | 7 or 8 or 9                                                                                                                                                                                                                  | 39062   |
| 11 | exp "Arrhythmias (Heart)"/                                                                                                                                                                                                   | 2273    |
| 12 | ("atrial fibrillation" or "atrial flutter" or AFIB or arrhythmi* or AF).mp. [mp=title, abstract, heading word, table of contents, key concepts, original title, tests & measures, mesh]                                      | 6767    |
| 13 | 11 or 12                                                                                                                                                                                                                     | 7336    |



|    |                                                                                                                                                                                                                                                                                                        |       |
|----|--------------------------------------------------------------------------------------------------------------------------------------------------------------------------------------------------------------------------------------------------------------------------------------------------------|-------|
| 14 | ("arterial stiffness" or "pulse pressure" or "wave reflections" or "augmentation index" or "pulse wave velocity" or "aortic stiffness" or "central pressure" or "arterial compliance").mp. [mp=title, abstract, heading word, table of contents, key concepts, original title, tests & measures, mesh] | 692   |
| 15 | exp Heart Disorders/                                                                                                                                                                                                                                                                                   | 15105 |
| 16 | ((isch?emic or coronary) and (heart or artery or arteries or disease or syndrome)) or myocard* or angina).mp. [mp=title, abstract, heading word, table of contents, key concepts, original title, tests & measures, mesh]                                                                              | 23253 |
| 17 | 15 or 16                                                                                                                                                                                                                                                                                               | 30470 |
| 18 | (hyperlipid?emia or dyslipid?emia or hypercholesterol?emia or cholesterol or HDL or LDL).mp. [mp=title, abstract, heading word, table of contents, key concepts, original title, tests & measures, mesh]                                                                                               | 12096 |
| 19 | 6 or 10 or 13 or 14 or 17 or 18                                                                                                                                                                                                                                                                        | 76948 |
| 20 | exp meta analysis/ or exp "systematic review"/                                                                                                                                                                                                                                                         | 5615  |
| 21 | (systematic review or meta-analysis).ti,ab,hw.                                                                                                                                                                                                                                                         | 58362 |
| 22 | meta-analysis/ or systematic review/ or systematic reviews as topic/ or meta-analysis as topic/ or "meta analysis (topic)"/ or "systematic review (topic)"/ or exp technology assessment, biomedical/ or network meta-analysis/                                                                        | 5615  |
| 23 | ((systematic* adj3 (review* or overview*)) or (methodologic* adj3 (review* or overview*))).ti,ab,hw.                                                                                                                                                                                                   | 43275 |
| 24 | ((quantitative adj3 (review* or overview* or synthes*)) or (research adj3 (integrati* or overview*))).ti,ab,hw.                                                                                                                                                                                        | 10042 |
| 25 | ((integrative adj3 (review* or overview*)) or (collaborative adj3 (review* or overview*)) or (pool* adj3 analy*)).ti,ab,hw.                                                                                                                                                                            | 5461  |
| 26 | (data synthes* or data extraction* or data abstraction*).ti,ab,hw.                                                                                                                                                                                                                                     | 3051  |
| 27 | (handsearch* or hand search*).ti,ab,hw.                                                                                                                                                                                                                                                                | 1395  |
| 28 | (mantel haenszel or peto or der simonian or dersimonian or fixed effect* or latin square*).ti,ab,hw.                                                                                                                                                                                                   | 5363  |
| 29 | (met analy* or metanaly* or technology assessment* or HTA or HTAs or technology overview* or technology appraisal*).ti,ab,hw.                                                                                                                                                                          | 936   |
| 30 | (meta regression* or metaregression*).ti,ab,hw.                                                                                                                                                                                                                                                        | 2060  |

|    |                                                                                                                                     |        |
|----|-------------------------------------------------------------------------------------------------------------------------------------|--------|
| 31 | (meta-analy* or metaanaly* or systematic review* or biomedical technology assessment* or bio-medical technology assessment*).mp,hw. | 69387  |
| 32 | (medline or cochrane or pubmed or medlars or embase or cinahl).ti,ab,hw.                                                            | 29041  |
| 33 | (cochrane or (health adj2 technology assessment) or evidence report).jw.                                                            | 0      |
| 34 | (comparative adj3 (efficacy or effectiveness)).ti,ab,hw.                                                                            | 2174   |
| 35 | (outcomes research or relative effectiveness).ti,ab,hw.                                                                             | 3703   |
| 36 | ((indirect or indirect treatment or mixed-treatment or bayesian) adj3 comparison*).ti,ab,hw.                                        | 472    |
| 37 | (meta-analysis or systematic review).md.                                                                                            | 51431  |
| 38 | (multi* adj3 treatment adj3 comparison*).ti,ab,hw.                                                                                  | 46     |
| 39 | (mixed adj3 treatment adj3 (meta-analy* or metaanaly*)).ti,ab,hw.                                                                   | 19     |
| 40 | umbrella review*.ti,ab,hw.                                                                                                          | 139    |
| 41 | (multi* adj2 paramet* adj2 evidence adj2 synthesis).ti,ab,hw.                                                                       | 2      |
| 42 | (multiparamet* adj2 evidence adj2 synthesis).ti,ab,hw.                                                                              | 6      |
| 43 | (multi-paramet* adj2 evidence adj2 synthesis).ti,ab,hw.                                                                             | 2      |
| 44 | or/20-43                                                                                                                            | 113404 |
| 45 | 3 and 19 and 44                                                                                                                     | 233    |

## CDSR

Date Run: 07/10/2021 22:33:34

| ID  | Search Hits                                                                                                                                                                               |
|-----|-------------------------------------------------------------------------------------------------------------------------------------------------------------------------------------------|
| #1  | MeSH descriptor: [Dementia] explode all trees 6314                                                                                                                                        |
| #2  | dement* or Alzheimer* 29411                                                                                                                                                               |
| #3  | #1 OR #2 29568                                                                                                                                                                            |
| #4  | MeSH descriptor: [Heart Failure] explode all trees 9974                                                                                                                                   |
| #5  | (myocard* or cardia* or heart or ventric*) NEXT (failure or decompensation or insufficien* or dysfunction*) 36145                                                                         |
| #6  | cardiomyopath* 4633                                                                                                                                                                       |
| #7  | MeSH descriptor: [Hypertension] explode all trees 19200                                                                                                                                   |
| #8  | hypertens* or "blood pressure" 135375                                                                                                                                                     |
| #9  | MeSH descriptor: [Blood Pressure Monitoring, Ambulatory] explode all trees 1517                                                                                                           |
| #10 | "24-hour blood pressure monitoring" or "home blood pressure monitoring" 328                                                                                                               |
| #11 | MeSH descriptor: [Arrhythmias, Cardiac] explode all trees 9989                                                                                                                            |
| #12 | "atrial fibrillation" or "atrial flutter" or AFIB or arrhythmi* or AF 33281                                                                                                               |
| #13 | MeSH descriptor: [Vascular Stiffness] explode all trees 607                                                                                                                               |
| #14 | "arterial stiffness" or "pulse pressure" or "wave reflections" or "augmentation index" or "pulse wave velocity" or "aortic stiffness" or "central pressure" or "arterial compliance" 5715 |
| #15 | MeSH descriptor: [Myocardial Ischemia] explode all trees 29189                                                                                                                            |
| #16 | ((isch*mic or coronary) and (heart or arter* or disease or syndrome)) or myocard* or angina 95591                                                                                         |
| #17 | MeSH descriptor: [Hyperlipidemias] explode all trees 6571                                                                                                                                 |
| #18 | hyperlipid*mia or dyslipid*mia or hypercholesterol*mia or cholesterol or HDL or LDL 51003                                                                                                 |
| #19 | #4 OR #5 OR #6 OR #7 OR #8 OR #9 OR #10 OR #11 OR #12 OR #13 OR #14 OR #15 OR #16 OR #17 OR #18 279224                                                                                    |
| #20 | #3 AND #19 3232                                                                                                                                                                           |

In total 334 reviews found, 45 protocols, 2851 trials, 1 editorial, 1 special collection.

Supplementary Table 2. Data extracted from included meta-analyses

| Author and date     | Cardiovascular variable               | Dementia outcome   | No. studies in meta-analysis | Age at baseline (years) | Age stratification | Follow-up (Range) | Total sample size (dementia cases) | Ratio used | Result (95%CI)     | p-value | I2 (%) | p-value I2 | Notes                          |  |
|---------------------|---------------------------------------|--------------------|------------------------------|-------------------------|--------------------|-------------------|------------------------------------|------------|--------------------|---------|--------|------------|--------------------------------|--|
| <b>CHD</b>          |                                       |                    |                              |                         |                    |                   |                                    |            |                    |         |        |            |                                |  |
| Deckers 2017        | CHD                                   | All-cause dementia | 7                            | ≥ 45                    | NR                 | NR                | NR                                 | OR         | 1.55 (1.20 - 1.84) | 0.001   | 40.6   | 0.121      | Population-based cohorts only  |  |
| Liang 2021 (1)      | CHD                                   | AD                 | 12                           | NR                      | NR                 | NR                | NR                                 | RR         | 0.99 (0.92 - 1.07) | NR      | 49.8   | 0.025      |                                |  |
| Liang 2021 (4)      | CHD                                   | VaD                | 4                            | NR                      | NR                 | NR                | NR                                 | RR         | 1.34 (1.28 - 1.39) | NR      | 36.1   | 0.196      |                                |  |
| Liang 2021 (2)      | CHD (MI)                              | AD                 | 7                            | NR                      | NR                 | NR                | NR                                 | RR         | 1.09 (0.90 - 1.33) | NR      | 41.7   | 0.113      |                                |  |
| Liang 2021 (3)      | CHD (AP)                              | AD                 | 3                            | NR                      | NR                 | NR                | NR                                 | RR         | 0.98 (0.79 - 1.22) | NR      | 65.4   | 0.055      |                                |  |
| Wolters 2018 (3)    | CHD                                   | All-cause dementia | 13                           | 62.1 - 81.5             | Late-life          | 2 - 9.3           | 1,309,483                          | RR         | 1.27 (1.08 - 1.50) | NR      | 80     | 0.0001     |                                |  |
| Wolters 2018 (4)    | CHD                                   | All-cause dementia | 9                            | NR                      | NR                 | NR                | NR                                 | RR         | 1.26 (1.08 - 1.47) | NR      | 0      | NR         |                                |  |
| Wolters 2018 (1)    | CHD                                   | AD                 | 8                            | NR                      | NR                 | NR                | NR                                 | RR         | 1.07 (0.90 - 1.28) | NR      | 31     | NR         |                                |  |
| Wolters 2018 (2)    | CHD                                   | AD                 | 8                            | NR                      | NR                 | NR                | NR                                 | RR         | 1.23 (1.01 - 1.50) | NR      | NR     | NR         | Population-based cohorts only  |  |
| <b>HF</b>           |                                       |                    |                              |                         |                    |                   |                                    |            |                    |         |        |            |                                |  |
| Li 2020 (2)         | HF                                    | All-cause dementia | 20                           | NR                      | NR                 | NR                | 2,406,680                          | OR/RR      | 1.28 (1.15 - 1.43) | NR      | 70     | <0.001     | Population-based cohorts only  |  |
| Li 2020 (1)         | HF                                    | AD                 | 4                            | NR                      | NR                 | NR                | 1,950,347                          | OR/RR      | 1.38 (0.90 - 2.13) | NR      | 74.8   | 0.008      |                                |  |
| Wolters 2018 (2)    | HF                                    | All-cause dementia | 7                            | 69.0 - 81.5             | Late-life          | 4 - 8.6           | 1,958,702                          | RR         | 1.59 (1.19 - 2.13) | NR      | 58     | NR         |                                |  |
| Wolters 2018 (3)    | HF                                    | All-cause dementia | 4                            | NR                      | NR                 | NR                | NR                                 | RR         | 1.80 (1.41 - 2.32) | NR      | 0      | NR         |                                |  |
| Wolters 2018 (1)    | HF                                    | AD                 | 5                            | NR                      | NR                 | NR                | NR                                 | RR         | 1.44 (0.95 - 2.16) | NR      | 74     | NR         |                                |  |
| Xu 2015             | HF                                    | AD                 | 3                            | NR                      | NR                 | NR                | 145,555                            | OR/RR      | 1.34 (0.50 - 2.19) | NR      | 71.3   | 0.031      |                                |  |
| <b>AF</b>           |                                       |                    |                              |                         |                    |                   |                                    |            |                    |         |        |            |                                |  |
| Islam 2019 (2)      | AF                                    | All-cause dementia | 16                           | >18                     | NR                 | 1.8 - 26.6        | 2,415,35 (200,653)                 | HR         | 1.36 (1.23 - 1.51) | <0.001  | 83.6   | NR         | Overall<br>Non-stroke subgroup |  |
| Islam 2019 (1)      | AF                                    | AD                 | 6                            | >18                     | NR                 | NR                | NR                                 | HR         | 1.24 (1.03 - 1.49) | 0.02    | 40.5   | NR         |                                |  |
| Kwok 2011 (1)       | AF                                    | All-cause dementia | 14                           | NR                      | NR                 | NR                | NR                                 | OR         | 1.98 (1.43 - 2.73) | <0.001  | 75     | <0.001     |                                |  |
| Kwok 2011 (2)       | AF                                    | All-cause dementia | 7                            | NR                      | NR                 | NR                | NR                                 | OR         | 1.64 (1.00 - 2.71) | 0.05    | 87     | <0.001     |                                |  |
| Liu 2019            | AF                                    | All-cause dementia | 11                           | 50.3 - 75.7             | NR                 | 1.8 - 26.6        | 112,876                            | HR         | 1.34 (1.24 - 1.44) | NR      | 0      | NR         |                                |  |
| Papanastasiou 2021  | AF                                    | All-cause dementia | 17                           | NR                      | NR                 | NR                | NR                                 | HR         | 1.36 (1.24 - 1.49) | NR      | 92     | <0.001     |                                |  |
| Proietti 2020       | AF                                    | AD                 | 7                            | 50 - 78                 | NR                 | 3 - 25 years      | 56,370                             | HR         | 1.30 (1.01 - 1.59) | NR      | 48.1   | 0.073      |                                |  |
| Santangeli 2012     | AF                                    | All-cause dementia | 8                            | 61 - 84                 | Late-life          | 1.8 - 30.0        | 77,668                             | HR         | 1.42 (1.17 - 1.72) | <0.001  | 50     | NR         |                                |  |
| Xu 2015             | AF                                    | AD                 | 3                            | NR                      | NR                 | NR                | 5,240                              | OR/RR      | 1.29 (0.97 - 1.60) | NR      | 60.6   | 0.079      |                                |  |
| Zuin 2021 (2)       | AF                                    | All-cause dementia | 18                           | NR                      | NR                 | NR                | 3,559,349 (902,741)                | HR         | 1.40 (1.27 - 1.54) | <0.001  | 93.5   | <0.001     |                                |  |
| Zuin 2021 (1)       | AF                                    | AD                 | 9                            | NR                      | NR                 | NR                | NR                                 | HR         | 1.30 (1.12 - 1.51) | <0.001  | 87.6   | <0.001     |                                |  |
| <b>Hypertension</b> |                                       |                    |                              |                         |                    |                   |                                    |            |                    |         |        |            |                                |  |
| Guan 2011           | Hypertension (≥160/90mmHg)            | AD                 | 9                            | >40                     | NR                 | 1 - 32 years      | 15,292                             | RR         | 1.01 (0.87 - 1.18) | NR      | 37.2   | 0.12       |                                |  |
| Lennon 2019 (1)     | Hypertension (SBP>140mmHg)            | AD                 | 4                            | 50.4 - 63               | Midlife            | 13 - 22           | NR                                 | HR         | 1.18 (1.02 - 1.35) | 0.007   | 0      | NR         |                                |  |
| Lennon 2019 (2)     | Hypertension (SBP ≥160mmHg)           | AD                 | 4                            | 50.4 - 63               | Midlife            | 13.4 - 22         | NR                                 | HR         | 1.25 (1.06 - 1.47) | 0.021   | 0      | NR         |                                |  |
| Li 2019 (1)         | Hypertension (SBP≥160mmHg)            | AD                 | 5                            | 35 - 65                 | Midlife            | NR                | NR                                 | RR         | 1.72 (1.25 - 2.37) | NR      | 39     | 0.16       |                                |  |
| Li 2019 (2)         | Hypertension (SBP>140<160mmHg)        | AD                 | 7                            | 35 - 65                 | Midlife            | NR                | NR                                 | RR         | 1.41 (1.23 - 1.62) | NR      | 10     | 0.35       |                                |  |
| Meng 2014 (1)       | Hypertension (≥160/95mmHg)            | AD                 | 3                            | 40 - 65                 | Midlife            | 14 - 32           | NR                                 | OR         | 1.10 (0.88 - 1.37) | NR      | 48.6   | 0.143      |                                |  |
| Meng 2014 (2)       | Hypertension (SBP ≥160mmHg)           | AD                 | 3                            | 40 - 65                 | Midlife            | 13.6 - 37         | NR                                 | OR         | 1.77 (0.93 - 3.37) | NR      | 0      | 0.48       |                                |  |
| Meng 2014 (3)       | Hypertension (DBP ≥160mmHg)           | AD                 | 3                            | 40 - 65                 | Midlife            | 13.6 - 27         | NR                                 | OR         | 2.38 (1.34 - 4.23) | NR      | 0      | 0.375      |                                |  |
| Meng 2014 (4)       | Hypertension (Overall)                | AD                 | 5                            | 40 - 65                 | Midlife            | 13.6 - 37         | NR                                 | OR         | 1.31 (1.01 - 1.70) | NR      | 45.7   | 0.065      |                                |  |
| Power 2011 (1)      | Hypertension (history and enrollment) | AD                 | 13                           | 58 - 76                 | NR                 | NR                | NR                                 | RR         | 0.97 (0.80 - 1.16) | NR      | 47     | NR         |                                |  |
| Power 2011 (2)      | Hypertension (history and enrollment) | AD                 | 12                           | >65                     | Late-life          | NR                | NR                                 | RR         | 0.95 (0.78 - 1.14) | NR      | NR     | NR         |                                |  |
| Sharp 2011          | Hypertension (history)                | VaD                | 6                            | NR                      | NR                 | 3.2 - 10          | 8,123                              | OR         | 1.59 (1.29 - 1.95) | <0.001  | 37.4   | 0.16       |                                |  |
| Xu 2015 (1)         | Hypertension (SBP)                    | AD                 | 49                           | NR                      | NR                 | NR                | 2,290,617                          | OR/RR      | 0.99 (0.88 - 1.09) | NR      | 85.5   | <0.001     |                                |  |
| Xu 2015 (2)         | Hypertension (SBP>160mmHg)            | AD                 | 6                            | NR                      | NR                 | NR                | NR                                 | OR/RR      | 1.05 (1.01 - 1.08) | NR      | 0      | NR         |                                |  |
| Wang 2018 (2)       | Hypertension (High SBP)               | All-cause dementia | 4                            | <65                     | Midlife            | NR                | NR                                 | RR         | 1.36 (1.06 - 1.75) | NR      | 43.4   | 0.151      |                                |  |
| Wang 2018 (3)       | Hypertension (High DBP)               | All-cause dementia | 2                            | <65                     | Midlife            | NR                | NR                                 | RR         | 1.60 (1.02 - 2.53) | NR      | 23.9   | 0.252      |                                |  |
| Wang 2018 (10)      | Hypertension (High SBP)               | All-cause dementia | 10                           | ≥65                     | Late-life          | NR                | NR                                 | RR         | 1.10 (0.86 - 1.40) | NR      | 67.5   | <0.001     |                                |  |
| Wang 2018 (11)      | Hypertension (High DBP)               | All-cause dementia | 7                            | ≥65                     | Late-life          | NR                | NR                                 | RR         | 1.06 (0.68 - 1.65) | NR      | 67.2   | 0.006      |                                |  |
| Wang 2018 (12)      | Hypertension (Not defined)            | All-cause dementia | 4                            | ≥65                     | Late-life          | NR                | NR                                 | RR         | 0.98 (0.69 - 1.39) | NR      | 72.1   | 0.013      |                                |  |
| Wang 2018 (13)      | Hypertension (High SBP)               | All-cause dementia | 4                            | 65 - 75                 | Late-life          | NR                | NR                                 | RR         | 0.99 (0.64 - 1.53) | NR      | 83.6   | <0.001     |                                |  |
| Wang 2018 (14)      | Hypertension (High DBP)               | All-cause dementia | 3                            | 65 - 75                 | Late-life          | NR                | NR                                 | RR         | 0.73 (0.57 - 0.96) | NR      | 0      | 0.877      |                                |  |
| Wang 2018 (15)      | Hypertension (High SBP)               | All-cause dementia | 3                            | 75 - 85                 | Late-life          | NR                | NR                                 | RR         | 1.26 (0.98 - 1.63) | NR      | 0      | 0.686      |                                |  |
| Wang 2018 (16)      | Hypertension (High DBP)               | All-cause dementia | 2                            | 75 - 85                 | Late-life          | NR                | NR                                 | RR         | 0.90 (0.46 - 1.73) | NR      | 34.4   | 0.217      |                                |  |
| Wang 2018 (1)       | Hypertension (High SBP)               | AD                 | 2                            | <65                     | Midlife            | NR                | NR                                 | RR         | 1.50 (0.56 - 4.04) | NR      | 77.3   | 0.036      |                                |  |
| Wang 2018 (4)       | Hypertension (High SBP)               | AD                 | 8                            | ≥65                     | Late-life          | NR                | NR                                 | RR         | 1.00 (0.79 - 1.25) | NR      | 31     | 0.18       |                                |  |
| Wang 2018 (5)       | Hypertension (High DBP)               | AD                 | 5                            | ≥65                     | Late-life          | NR                | NR                                 | RR         | 0.75 (0.43 - 1.32) | NR      | 54.5   | 0.066      |                                |  |
| Wang 2018 (6)       | Hypertension (High SBP)               | AD                 | 3                            | 65 - 75                 | Late-life          | NR                | NR                                 | RR         | 1.01 (0.66 - 1.53) | NR      | 35     | 0.215      |                                |  |
| Wang 2018 (7)       | Hypertension (High DBP)               | AD                 | 2                            | 65 - 75                 | Late-life          | NR                | NR                                 | RR         | 0.71 (0.30 - 1.67) | NR      | 0      | 0.616      |                                |  |
| Wang 2018 (8)       | Hypertension (High SBP)               | AD                 | 3                            | 75 - 85                 | Late-life          | NR                | NR                                 | RR         | 1.07 (0.63 - 1.82) | NR      | 66.2   | 0.052      |                                |  |
| Wang 2018 (9)       | Hypertension (High DBP)               | AD                 | 2                            | 75 - 85                 | Late-life          | NR                | NR                                 | RR         | 0.52 (0.32 - 0.85) | NR      | 18.7   | 0.267      |                                |  |
| Wang 2018 (17)      | Hypertension (High SBP)               | VaD                | 3                            | ≥65                     | Late-life          | NR                | NR                                 | RR         | 1.57 (1.21 - 2.04) | NR      | 0      | 0.771      |                                |  |

|                           |                                             |                    |    |         |           |           |              |       |                      |        |      |        |
|---------------------------|---------------------------------------------|--------------------|----|---------|-----------|-----------|--------------|-------|----------------------|--------|------|--------|
| Wang 2018 (18)            | Hypertension (Not defined)                  | VaD                | 2  | ≥65     | Late-life | NR        | NR           | RR    | 3.69 (1.57 - 8.72)   | NR     | 24.7 | 0.249  |
| <b>Hyperlipidaemia</b>    |                                             |                    |    |         |           |           |              |       |                      |        |      |        |
| Anstey 2008 (2)           | Hyperlipidaemia (TC)                        | All-cause dementia | 6  | <60     | Midlife   | 5.6 - 36  | 4,407        | RR    | 0.97 (0.77 - 1.23)   | 0.82   | NR   | NR     |
| Anstey 2008 (1)           | Hyperlipidaemia (TC)                        | AD                 | 8  | <60     | Midlife   | 4.8 - 29  | 5,526        | RR    | 0.85 (0.65 - 1.12)   | 0.24   | NR   | NR     |
| Anstey 2008 (3)           | Hyperlipidaemia (TC)                        | VaD                | 4  | <60     | Midlife   | 4.8 - 29  | 4,246        | RR    | 1.48 (0.79 - 2.76)   | 0.22   | NR   | NR     |
| Anstey 2017 (1)           | Hyperlipidaemia (TC)                        | AD                 | 3  | 40 - 60 | Midlife   | 18 - 32   | 3,335        | RR    | 2.14 (1.33 - 3.44)   | <0.01  | NR   | NR     |
| Anstey 2017 (3)           | Hyperlipidaemia (TC)                        | Dementia           | 2  | 40 - 60 | Midlife   | NR        | 3,392        | RR    | 1.47 (0.96 - 2.27)   | 0.08   | NR   | NR     |
| Anstey 2017 (2)           | Hyperlipidaemia (TC)                        | AD/Dementia        | 4  | 40 - 60 | Midlife   | NR        | NR           | RR    | 1.82 (1.27 - 2.60)   | <0.01  | NR   | NR     |
| Anstey 2017 (4)           | Hyperlipidaemia (TC)                        | AD                 | 4  | >60     | Late-life | NR        | 7,308        | RR    | 0.93 (0.69 - 1.26)   | 0.65   | NR   | NR     |
| Anstey 2017 (6)           | Hyperlipidaemia (TC)                        | VaD                | 2  | >60     | Late-life | NR        | 4,066        | RR    | 0.96 (0.71 - 1.30)   | 0.79   | NR   | NR     |
| Anstey 2017 (5)           | Hyperlipidaemia (TC)                        | Any dementia       | 3  | >60     | Late-life | NR        | 5,467        | RR    | 1.03 (0.74 - 1.43)   | 0.88   | NR   | NR     |
| Anstey 2017 (1)           | Hyperlipidaemia (HDL-C)                     | AD                 | 3  | >60     | Late-life | NR        | 6,062        | RR    | 0.78 (0.54 - 1.13)   | 0.19   | NR   | NR     |
| Anstey 2017 (2)           | Hyperlipidaemia (HDL-C)                     | VaD                | 2  | >60     | Late-life | NR        | 10,558       | RR    | 1.13 (0.60 - 2.14)   | 0.7    | NR   | NR     |
| Anstey 2017 (3)           | Hyperlipidaemia (HDL-C)                     | Any dementia       | 2  | >60     | Late-life | NR        | 5,075        | RR    | 1.06 (0.71 - 1.56)   | 0.79   | NR   | NR     |
| Anstey 2017 (1)           | Hyperlipidaemia (TG)                        | VaD                | 2  | >60     | Late-life | NR        | 10,558       | RR    | 1.66 (0.68 - 4.04)   | 0.26   | NR   | NR     |
| Li 2019                   | Hyperlipidaemia (Hypercholesterolemia)      | All-cause dementia | 4  | <65     | Midlife   | 12.8 - 28 | NR           | RR    | 1.57 (1.19 - 2.07)   | NR     | 0    | 0.78   |
| Meng 2014                 | Hyperlipidaemia (Hypercholesterolemia)      | AD                 | 4  | 40 - 65 | Midlife   | 21 - 32   | NR           | OR    | 1.72 (1.32 - 2.24)   | <0.001 | 8.5  | 0.351  |
| Tang 2019 (2)             | Hyperlipidaemia (TC)                        | AD                 | 18 | >70     | Late-life | NR        | NR           | SMD   | 0.05 (-0.09 - 0.20)  | 0.47   | 72   | <0.001 |
| Tang 2019 (1)             | Hyperlipidaemia (TC Overall)                | AD                 | 25 | NR      | NR        | NR        | 4,920 (2159) | SMD   | 0.17 (0.01 - 0.32)   | 0.03   | 82   | <0.001 |
| Tang 2019 (2)             | Hyperlipidaemia (HDL-C)                     | AD                 | 14 | >70     | Late-life | NR        | NR           | SMD   | 0.03 (-0.26 - 0.19)  | 0.78   | 87   | <0.001 |
| Tang 2019 (1)             | Hyperlipidaemia (HDL-C Overall)             | AD                 | 18 | NR      | NR        | NR        | 3,968 (1671) | SMD   | -0.15 (-0.34 - 0.05) | 0.15   | 87   | <0.001 |
| Tang 2019 (2)             | Hyperlipidaemia (LDL-C)                     | AD                 | 13 | >70     | Late-life | NR        | NR           | SMD   | 0.06 (-0.09 - 0.22)  | 0.44   | 70   | <0.001 |
| Tang 2019 (1)             | Hyperlipidaemia (LDL-C Overall)             | AD                 | 17 | NR      | NR        | NR        | 3,862 (1627) | SMD   | 0.18 (-0.02 - 0.38)  | 0.08   | 87   | <0.001 |
| Tang 2019 (2)             | Hyperlipidaemia (TG)                        | AD                 | 13 | >70     | Late-life | NR        | NR           | SMD   | -0.03 (-0.15 - 0.09) | 0.64   | 51   | <0.001 |
| Tang 2019 (1)             | Hyperlipidaemia (TG Overall)                | AD                 | 17 | NR      | NR        | NR        | 3,846 (1589) | SMD   | -0.00 (-0.12 - 0.12) | 1      | 62   | <0.001 |
| Wu 2019                   | Hyperlipidaemia (TC)                        | AD                 | NR | NR      | NR        | NR        | NR           | OR    | 1.58 (1.10 - 2.92)   | NR     | NR   | NR     |
| Wu 2019                   | Hyperlipidaemia (LDL-C)                     | AD                 | NR | NR      | NR        | NR        | NR           | OR    | 1.64 (1.07 - 2.51)   | NR     | NR   | NR     |
| Wu 2019                   | Hyperlipidaemia (HDL-C)                     | AD                 | NR | NR      | NR        | NR        | NR           | OR    | 0.81 (0.55 - 1.19)   | NR     | NR   | NR     |
| Wu 2019                   | Hyperlipidaemia (TG)                        | AD                 | NR | NR      | NR        | NR        | NR           | OR    | 1.33 (0.99 - 1.79)   | NR     | NR   | NR     |
| Xu 2015                   | Hyperlipidaemia (HDL-C)                     | AD                 | 7  | NR      | NR        | NR        | 11,991       | OR/RR | 1.00 (0.86 - 1.14)   | NR     | 0    | 0.942  |
| Xu 2015                   | Hyperlipidaemia (TC)                        | AD                 | 18 | NR      | NR        | NR        | 2,246,895    | OR/RR | 0.96 (0.81 - 1.11)   | NR     | 88   | <0.001 |
| Zhou 2020                 | Hyperlipidaemia (LDL-C)                     | AD                 | 26 | NR      | NR        | NR        | 7,033 (2266) | SMD   | 0.35 (0.12 - 0.58)   | <0.01  | 93   | <0.001 |
| <b>Arterial stiffness</b> |                                             |                    |    |         |           |           |              |       |                      |        |      |        |
| Liu 2021 (2)              | Arterial stiffness (Aortic PWV categorical) | All-cause dementia | 3  | >18     | NR        | 1 to 15   | NR           | OR    | 2.10 (1.16 - 3.80)   | 0.014  | 64.7 | 0.06   |
| Liu 2021 (2)              | Arterial stiffness (Aortic PWV continuous)  | All-cause dementia | 5  | >18     | NR        | 1 to 15   | NR           | OR    | 1.11 (0.98 - 1.25)   | 0.103  | 76.6 | 0.002  |

Quartiles (Highest vs. lowest)  
Quartiles (Highest vs. lowest)

Asian-only population  
Asian-only population  
Asian-only population

Abbreviations:

|       |                                      |
|-------|--------------------------------------|
| AD    | Alzheimer's disease                  |
| AF    | Atrial fibrillation                  |
| AP    | Angina pectoris                      |
| CHD   | Coronary heart disease               |
| DBP   | Diastolic blood pressure             |
| HDL-C | High-density lipoprotein cholesterol |
| HF    | Heart failure                        |
| HR    | Hazard ratio                         |
| LDL-C | Low-density lipoprotein cholesterol  |
| MI    | Myocardial infarction                |
| NR    | Not reported                         |
| OR    | Odds ratio                           |
| PWV   | Pulse wave velocity                  |
| RR    | Risk ratio                           |
| SBP   | Systolic blood pressure              |
| SMD   | Standardized mean difference         |
| TC    | Total cholesterol                    |
| TG    | Triglycerides                        |
| VaD   | Vascular dementia                    |

|                    | 1 | 2 | 3 | 4 | 5 | 6 | 7 | 8 | 9 | 10 | 11 | Overall score | %   |
|--------------------|---|---|---|---|---|---|---|---|---|----|----|---------------|-----|
| Anstey 2017        | 1 | 1 | 1 | 1 | 0 | 1 | 0 | 1 | 1 | 1  | 1  | 10            | 91  |
| Anstey 2008        | 1 | 1 | 1 | 1 | 0 | 0 | 1 | 1 | 0 | 1  | 1  | 8             | 73  |
| Deckers 2017       | 1 | 1 | 1 | 1 | 1 | 1 | 1 | 1 | 1 | 1  | 1  | 11            | 100 |
| Guan 2011          | 1 | 1 | 1 | 1 | 1 | 1 | 1 | 1 | 0 | 1  | 1  | 10            | 91  |
| Islam 2019         | 1 | 1 | 1 | 1 | 1 | 1 | 1 | 1 | 1 | 1  | 0  | 10            | 91  |
| Koch 2016          | 1 | 1 | 1 | 1 | 0 | 0 | 0 | 1 | 1 | 0  | 1  | 7             | 64  |
| Kwok 2011          | 1 | 1 | 1 | 1 | 1 | 0 | 1 | 1 | 1 | 0  | 1  | 9             | 82  |
| Lennon 2019        | 1 | 1 | 1 | 1 | 1 | 0 | 0 | 1 | 1 | 0  | 1  | 8             | 73  |
| Liang 2021         | 0 | 0 | 1 | 1 | 0 | 0 | 0 | 1 | 1 | 0  | 1  | 6             | 55  |
| Li 2020            | 0 | 0 | 0 | 1 | 0 | 0 | 0 | 1 | 1 | 0  | 1  | 5             | 46  |
| Liu 2019           | 1 | 1 | 0 | 1 | 1 | 0 | 1 | 1 | 1 | 0  | 1  | 8             | 73  |
| Liu 2021           | 1 | 1 | 1 | 1 | 1 | 1 | 1 | 1 | 1 | 1  | 0  | 10            | 91  |
| Li 2019            | 1 | 1 | 1 | 1 | 1 | 1 | 1 | 1 | 1 | 1  | 1  | 11            | 100 |
| Meng 2014          | 1 | 1 | 1 | 1 | 1 | 0 | 0 | 1 | 1 | 0  | 1  | 8             | 73  |
| Papanastasiou 2021 | 1 | 1 | 1 | 1 | 1 | 1 | 1 | 1 | 1 | 1  | 1  | 11            | 100 |
| Power 2011         | 1 | 1 | 0 | 1 | 1 | 1 | 1 | 1 | 1 | 1  | 1  | 10            | 91  |
| Santangeli 2012    | 1 | 1 | 1 | 1 | 1 | 1 | 1 | 1 | 1 | 1  | 1  | 11            | 100 |
| Sharp 2011         | 1 | 1 | 1 | 1 | 0 | 0 | 1 | 1 | 0 | 1  | 1  | 8             | 73  |
| Tang 2019          | 1 | 1 | 1 | 1 | 1 | 1 | 1 | 1 | 0 | 1  | 1  | 10            | 91  |
| Wang 2018          | 1 | 1 | 1 | 1 | 1 | 0 | 0 | 1 | 0 | 1  | 1  | 8             | 73  |
| Wolters 2018       | 1 | 1 | 1 | 1 | 1 | 1 | 1 | 1 | 1 | 1  | 1  | 11            | 100 |
| Wu 2019            | 1 | 1 | 1 | 1 | 1 | 1 | 0 | 1 | 1 | 1  | 1  | 10            | 91  |
| Xu 2015            | 1 | 1 | 1 | 1 | 1 | 0 | 0 | 1 | 1 | 1  | 1  | 9             | 82  |
| Zhou 2020          | 1 | 1 | 1 | 1 | 0 | 0 | 1 | 1 | 1 | 1  | 1  | 9             | 82  |
| Zuin 2021          | 1 | 1 | 1 | 1 | 1 | 1 | 1 | 1 | 1 | 1  | 1  | 11            | 100 |

**Supplementary Figure 1.** Heat map of JBI Critical Appraisal tool for Systematic Reviews. Green represents ‘Yes’, yellow as ‘Unclear’, and red as ‘No’. ‘Yes’ responses are given a score of ‘1’, whilst ‘Unclear’ or ‘No’ given a score of ‘0’. Systematic reviews without a meta-analysis are marked with an asterisk. Q1 Is the review question clearly and explicitly stated, Q2 Were the inclusion criteria appropriate for the review question, Q3 Was the search strategy appropriate, Q4 Were the sources and resources used to search for studies adequate, Q5 Were the criteria for appraising studies appropriate, Q6 Was critical appraisal conducted by two or more reviewers independently, Q7 Were there methods to minimize errors in data extraction, Q8 Were the methods used to combine studies appropriate, Q9 Was the likelihood of publication bias assessed, Q10 Were recommendations for policy and/or practice supported by the reported data, Q11 Were the specific directives for new research appropriate.
